# Supplementary material for: Invasive Ageratina adenophora (Asteraceae) in Agroecosystems of Kumaun Himalaya, India: A Threat to Plant Diversity and Sustainable Crop Yield
Source: MDPI journal article supplement (doi:10.3390/su151410748), 2023-07-08
Supplement: s1 [file s1]

**Table S1: Comparative phyto-sociological data of uninvaded (UR) and invaded (IR) ridge vegetation of Rice fields.**

| Species                                            | Family         | Habit, status and use | UR            |        |       |      |             |               | IR           |        |        |      |             |               |
|----------------------------------------------------|----------------|-----------------------|---------------|--------|-------|------|-------------|---------------|--------------|--------|--------|------|-------------|---------------|
|                                                    |                |                       | D             | F      | A     | A/F  | TBA         | IVI           | D            | F      | A      | A/F  | TBA         | IVI           |
| <i>Ageratina adenophora</i> R King & H. Rob.       | Asteraceae     | H, I, Med             | -             | -      | -     | -    | -           | -             | 202.33       | 100.00 | 136.22 | 2.02 | 20.26       | 157.27        |
| <i>Ageratum houstonianum</i> Mill.                 | Asteraceae     | H, I, Med             | 6.11          | 100.00 | 6.11  | 0.06 | 0.40        | 20.75         | 8.11         | 88.89  | 8.56   | 0.10 | 0.44        | 13.35         |
| <i>Arthraxon nudus</i> (Steud.) Hochst.            | Poaceae        | H, Fo                 | -             | -      | -     | -    | -           | -             | 11.22        | 77.78  | 5.83   | 0.16 | 0.01        | 10.52         |
| <i>Barleria cristata</i> L.                        | Acanthaceae    | H, Med                | -             | -      | -     | -    | -           | -             | 1.67         | 22.22  | 2.22   | 0.04 | 0.03        | 3.19          |
| <i>Bidens pilosa</i> L.                            | Asteraceae     | H, I, Fo, Med         | 1.89          | 55.56  | 3.17  | 0.06 | 0.40        | 11.94         | 0.22         | 11.11  | 1.11   | 0.02 | 0.07        | 1.36          |
| <i>Boehmeria diffusa</i> Wedd.                     | Urticaeae      | H, N, Med             | 6.00          | 100.00 | 6.00  | 0.06 | 0.91        | 27.01         | 6.00         | 77.78  | 9.61   | 0.15 | 0.81        | 11.14         |
| <i>Bothrichloa pertusa</i> A. Camus                | Poaceae        | H, N, Fo              | 50.22         | 100.00 | 50.22 | 0.50 | 0.61        | 54.86         | 6.67         | 11.11  | 11.11  | 0.60 | 0.04        | 4.96          |
| <i>Commelina benghalensis</i> L.                   | Commelinaceae  | H, N, Fo              | -             | -      | -     | -    | -           | -             | 0.56         | 11.11  | 1.67   | 0.05 | 0.02        | 1.51          |
| <i>Crysopogon gryllus</i> (L.) Trin.               | Poaceae        | H, N, Fo              | 44.11         | 100.00 | 44.11 | 0.44 | 0.86        | 53.34         | -            | -      | -      | -    | -           | -             |
| <i>Cynodon dactylon</i> (L.) Pers.                 | Poaceae        | H, N, Med, Fo         | -             | -      | -     | -    | -           | -             | 4.00         | 11.11  | 3.33   | 0.10 | 0.01        | 1.70          |
| <i>Cyperus iria</i> L.                             | Cyperaceae     | H, I, Fo              | 4.67          | 77.78  | 6.89  | 0.14 | 0.07        | 12.79         | 3.89         | 55.56  | 3.61   | 0.24 | 0.03        | 4.61          |
| <i>Cyperus rotundus</i> L.                         | Cyperaceae     | H, N, Fo              | 9.22          | 66.67  | 13.83 | 0.21 | 0.05        | 14.62         | 5.89         | 77.78  | 5.33   | 0.19 | 0.03        | 10.09         |
| <i>Dioscorea</i> sp.                               | Dioscoreaceae  | C, N, F, Fo           | 3.11          | 100.00 | 3.11  | 0.03 | 4.63        | 64.29         | -            | -      | -      | -    | -           | -             |
| <i>Echinochloa colona</i> (L.) Link                | Poaceae        | H, I, Fo              | -             | -      | -     | -    | -           | -             | 4.22         | 66.67  | 4.22   | 0.04 | 0.49        | 5.63          |
| <i>Equisetum</i> sp.                               | Equisetaceae   | H, N, Med             | 5.33          | 88.89  | 5.83  | 0.07 | 0.48        | 19.57         | 7.00         | 66.67  | 7.00   | 0.07 | 0.63        | 10.89         |
| <i>Euphorbia hirta</i> L.                          | Euphorbiaceae  | H, I, Med             | -             | -      | -     | -    | -           | -             | 1.22         | 22.22  | 1.83   | 0.03 | 0.15        | 3.38          |
| <i>Fimbristylis dichotoma</i> (L.) Vahl            | Cyperaceae     | H, N, Fo              | 5.44          | 55.56  | 10.17 | 0.21 | 0.15        | 12.00         | 1.11         | 77.78  | 1.78   | 0.05 | 0.03        | 4.66          |
| <i>Gonostegia hirta</i> Miq.                       | Urticaeae      | H, N, Fo              | -             | -      | -     | -    | -           | -             | 1.67         | 44.44  | 6.11   | 0.22 | 1.95        | 16.56         |
| <i>Persicaria glabra</i> (Willd.) M. Gómez         | Polygonaceae   | H, N, Fo              | -             | -      | -     | -    | -           | -             | 9.00         | 66.67  | 9.61   | 0.11 | 0.24        | 9.20          |
| <i>Plantago erosa</i> Wall.                        | Plantaginaceae | H, N, Fo              | -             | -      | -     | -    | -           | -             | 2.89         | 88.89  | 4.44   | 0.04 | 0.28        | 11.02         |
| <i>Ranunculus laetus</i> Wall. ex Hook.f. & Thoms. | Ranunculaceae  | H, E                  | -             | -      | -     | -    | -           | -             | 6.00         | 33.33  | 3.33   | 0.06 | 0.03        | 6.48          |
| <i>Reinwardtia indica</i> Dumort.                  | Linaceae       | H, N, Fo              | -             | -      | -     | -    | -           | -             | 4.44         | 33.33  | 5.06   | 0.07 | 0.44        | 7.96          |
| <i>Saccharum bengalense</i> Retz.                  | Poaceae        | H, N                  | -             | -      | -     | -    | -           | -             | 1.11         | 11.11  | 1.11   | 0.10 | 0.02        | 1.70          |
| <i>Setaria viridis</i> (L.) P. Beauv.              | Poaceae        | H, N, Fo              | -             | -      | -     | -    | -           | -             | 1.67         | 33.33  | 2.11   | 0.15 | 0.02        | 2.83          |
| <i>Smilax</i> sp.                                  | Smilacaceae    | C, N, Fo              | 2.33          | 55.56  | 3.67  | 0.06 | 0.08        | 8.82          | -            | -      | -      | -    | -           | -             |
| <b>Total</b>                                       |                |                       | <b>138.44</b> |        |       |      | <b>8.64</b> | <b>300.00</b> | <b>88.56</b> |        |        |      | <b>5.75</b> | <b>142.73</b> |

Where, UR-uninvaded ridge, IR-invaded ridge, D-density, TBA-total basal area, F-frequency, A-abundance, A/F-abundance to frequency, IVI-importance value index, H-herb, C-climber, N-native, I-invasive, F-food, Fo-fodder, Med-medicinal.

**Table S2: Comparative phyto-sociological data of uninvaded (UR) and invaded (IR) ridge vegetation of Soybean fields.**

| Species                                      | Family        | Habit, status and use | UR            |           |           |      |             |               | IR           |           |           |      |              |               |
|----------------------------------------------|---------------|-----------------------|---------------|-----------|-----------|------|-------------|---------------|--------------|-----------|-----------|------|--------------|---------------|
|                                              |               |                       | Density       | Frequency | Abundance | A/F  | TBA         | IVI           | Density      | Frequency | Abundance | A/F  | TBA          | IVI           |
| <i>Ammannia</i> sp.                          | Lythraceae    | C, N, F, Fo           | -             | -         | -         | -    | -           | -             | 0.80         | 20.00     | 1.33      | 0.02 | 0.01         | 2.64          |
| <i>Ageratina adenophora</i> R King & H. Rob. | Asteraceae    | H, I, Med             | -             | -         | -         | -    | -           | -             | 154.07       | 100.00    | 154.07    | 1.54 | 23.43        | 170.66        |
| <i>Ageratum houstonianum</i> Mill.           | Asteraceae    | H, I, Med             | 3.73          | 69.84     | 5.06      | 0.13 | 0.26        | 16.31         | 2.87         | 53.33     | 4.53      | 0.10 | 0.19         | 10.18         |
| <i>Arthraxon nudus</i> (Steud.) Hochst.      | Poaceae       | H, Fo                 | -             | -         | -         | -    | -           | -             | 0.73         | 20.00     | 2.50      | 0.10 | 0.00         | 3.21          |
| <i>Barleria cristata</i> L.                  | Acanthaceae   | H, Med                | 0.94          | 33.33     | 1.83      | 0.69 | 0.12        | 7.49          | 1.60         | 66.67     | 2.67      | 0.05 | 0.18         | 11.86         |
| <i>Bidens pilosa</i> L.                      | Asteraceae    | H, I, Fo, Med         | 1.37          | 53.17     | 2.53      | 0.05 | 0.32        | 14.15         | 4.93         | 66.67     | 7.42      | 0.12 | 0.75         | 14.50         |
| <i>Boehmeria diffusa</i> Wedd.               | Urticaeae     | H, N, Med             | 3.74          | 47.62     | 8.25      | 0.13 | 0.61        | 18.20         | 1.27         | 13.33     | 3.17      | 0.08 | 0.19         | 3.09          |
| <i>Bothrichloa pertusa</i> A. Camus.         | Poaceae       | H, N, Fo              | 36.85         | 73.81     | 45.44     | 0.37 | 0.46        | 32.58         | 2.53         | 26.67     | 10.89     | 0.51 | 0.03         | 6.17          |
| <i>Commelina benghalensis</i> L.             | Commelinaceae | H, Fo                 | 0.17          | 5.56      | 1.00      | 0.05 | 0.01        | 1.18          | -            | -         | -         | -    | -            | -             |
| <i>Crysopogon gryllus</i> (L.) Trin.         | Poaceae       | H, N, Fo              | 165.44        | 100.00    | 165.44    | 0.91 | 3.43        | 138.95        | 0.93         | 26.67     | 1.17      | 0.01 | 0.01         | 3.41          |
| <i>Cyanotis barbata</i> D. Don               | Commelinaceae | H, N,                 | 2.43          | 46.03     | 3.50      | 0.15 | 0.13        | 9.61          | 0.80         | 20.00     | 1.33      | 0.02 | 0.09         | 2.92          |
| <i>Cynodon dactylon</i> (L.) Pers.           | Poaceae       | H, N, Fo              | -             | -         | -         | -    | -           | -             | 1.93         | 33.33     | 4.92      | 0.19 | 0.02         | 6.69          |
| <i>Cyperus rotundus</i> L.                   | Cyperaceae    | H, I, Fo              | 3.34          | 57.94     | 6.53      | 0.27 | 0.06        | 11.65         | 2.07         | 40.00     | 4.58      | 0.16 | 0.19         | 7.03          |
| <i>Digitaria ciliaris</i> (Retz.) Koeler     | Poaceae       | H, N, Fo              | 8.95          | 51.59     | 14.00     | 0.25 | 0.05        | 12.08         | 2.87         | 46.67     | 5.58      | 0.13 | 0.08         | 8.04          |
| <i>Euphorbia hirta</i> L.                    | Euphorbiaceae | H, I                  | 0.30          | 20.63     | 1.00      | 0.07 | 0.01        | 3.27          | 0.67         | 26.67     | 0.83      | 0.01 | 0.02         | 3.31          |
| <i>Gonostegia hirta</i> Miq.                 | Urticaeae     | H, N, Fo              | -             | -         | -         | -    | -           | -             | 1.27         | 20.00     | 2.67      | 0.07 | 1.44         | 8.69          |
| <i>Persicaria glabra</i> (Willd.) M.Gómez    | Polygonaceae  | H, N, Fo              | 1.37          | 30.16     | 3.08      | 0.05 | 1.21        | 19.55         | 1.73         | 13.33     | 4.33      | 0.11 | 8.10         | 17.85         |
| <i>Reinwardtia indica</i> Dumort.            | Linaceae      | H, N, Fo              | 1.75          | 30.95     | 3.78      | 0.08 | 0.17        | 8.51          | 2.40         | 26.67     | 6.00      | 0.15 | 0.08         | 6.35          |
| <i>Saccharum bengalense</i> Retz.            | Poaceae       | H, N, Fo              | 1.33          | 11.11     | 4.00      | 0.10 | 0.04        | 2.59          | 3.60         | 26.67     | 10.67     | 0.41 | 0.34         | 7.24          |
| <i>Setaria viridis</i> (L.) P. Beauv.        | Poaceae       | H, N, Fo              | 2.62          | 14.29     | 6.11      | 0.14 | 0.04        | 3.88          | 1.93         | 33.33     | 4.06      | 0.09 | 0.05         | 6.15          |
| Total                                        |               |                       | <b>234.33</b> |           |           |      | <b>6.91</b> | <b>300.00</b> | <b>34.93</b> |           |           |      | <b>11.77</b> | <b>300.00</b> |

Where, UR-uninvaded ridge, IR-invaded ridge, D-density, TBA-total basal area, F-frequency, A-abundance, A/F-abundance to frequency, IVI-importance value index, H-herb, C-climber, N-native, E-exotic, F-food, Fo-fodder, Med-medicinal.

**Table S3: Uncertainty factor ( $^F U_{\text{meas}}$ ) for morphological, yield and yield related measurements.**

| Rice       |           |      |          |      |      |      |      |      | Soybean    |           |      |          |      |      |      |      |      |
|------------|-----------|------|----------|------|------|------|------|------|------------|-----------|------|----------|------|------|------|------|------|
| Parameters | Treatment |      | Distance |      |      |      |      |      | Parameters | Treatment |      | Distance |      |      |      |      |      |
|            |           |      | 0-1 m    |      | 2-3m |      | 4-5m |      |            |           |      | 0-1 m    |      | 2-3m |      | 4-5m |      |
|            | UR        | IR   | UR       | IR   | UR   | IR   | UR   | IR   |            | UR        | IR   | UR       | IR   | UR   | IR   | UR   | IR   |
| SL         | 1.10      | 1.38 | 1.07     | 1.19 | 1.11 | 1.12 | 1.08 | 1.68 | SL         | 1.49      | 1.51 | 1.17     | 1.22 | 1.12 | 1.15 | 1.06 | 1.15 |
| RL         | 1.39      | 1.37 | 1.33     | 1.31 | 1.41 | 1.41 | 1.42 | 1.38 | RL         | 1.12      | 1.10 | 1.09     | 1.06 | 1.09 | 1.09 | 1.08 | 1.07 |
| SD         | 1.17      | 1.23 | 1.16     | 1.19 | 1.19 | 1.21 | 1.10 | 1.18 | SD         | 1.33      | 1.32 | 1.24     | 1.23 | 1.16 | 1.19 | 1.20 | 1.12 |
| PL         | 1.14      | 1.16 | 1.15     | 1.15 | 1.16 | 1.16 | 1.09 | 1.12 | PN         | 1.36      | 1.25 | 1.15     | 1.09 | 1.15 | 1.13 | 1.13 | 1.03 |
| GN         | 1.47      | 1.53 | 1.39     | 1.45 | 1.53 | 1.57 | 1.39 | 1.42 | GN         | 1.23      | 1.34 | 1.10     | 1.21 | 1.19 | 1.16 | 1.10 | 1.16 |
| SY         | 1.38      | 1.52 | 1.28     | 1.33 | 1.47 | 1.60 | 1.27 | 1.36 | SY         | 1.57      | 1.59 | 1.20     | 1.40 | 1.35 | 1.27 | 1.11 | 1.22 |
| RY         | 2.01      | 2.14 | 2.29     | 2.10 | 2.07 | 1.89 | 1.58 | 2.37 | RY         | 1.66      | 1.79 | 1.19     | 1.23 | 1.32 | 1.40 | 1.14 | 1.26 |
| GY         | 1.65      | 1.83 | 1.87     | 2.05 | 1.49 | 1.59 | 1.35 | 1.34 | GY         | 1.31      | 1.43 | 1.12     | 1.25 | 1.19 | 1.20 | 1.14 | 1.18 |
| SPP        | 1.24      | 1.37 | 1.21     | 1.27 | 1.26 | 1.35 | 1.24 | 1.24 | PY         | 1.45      | 1.85 | 1.30     | 1.98 | 1.57 | 1.55 | 1.48 | 1.63 |
| SRL        | 2.04      | 1.91 | 2.12     | 2.02 | 2.21 | 1.68 | 1.81 | 1.98 | SRL        | 1.55      | 1.70 | 1.22     | 1.20 | 1.32 | 1.43 | 1.13 | 1.25 |
| HI         | 1.34      | 1.30 | 1.15     | 1.31 | 1.59 | 1.38 | 1.19 | 1.23 | HI         | 1.17      | 1.39 | 1.11     | 1.37 | 1.19 | 1.38 | 1.17 | 1.45 |
| R:S        | 1.86      | 1.94 | 1.92     | 1.88 | 1.79 | 1.94 | 1.75 | 1.85 | R:S        | 1.27      | 1.49 | 1.17     | 1.38 | 1.21 | 1.44 | 1.15 | 1.51 |
| TD         | 1.17      | 1.31 | 1.17     | 1.23 | 1.17 | 1.37 | 1.17 | 1.27 | Density    | 1.52      | 1.74 | 1.19     | 1.49 | 1.34 | 1.31 | 1.29 | 1.26 |
| HD         | 1.21      | 1.29 | 1.22     | 1.20 | 1.21 | 1.30 | 1.21 | 1.31 |            |           |      |          |      |      |      |      |      |
| TPH        | 1.15      | 1.16 | 1.17     | 1.23 | 1.14 | 1.13 | 1.14 | 1.13 |            |           |      |          |      |      |      |      |      |

TD–tiller density, HD–hill density, D– stem density, SL–shoot length, RL–root length, PL–panicle length, SPP–spikelets per panicle, PN– Pod number, PY–pod yield, SY–straw yield, RY–root yield, GY– grain yield, SD–stem diameter, HI–harvest index, R:S–root to shoot ratio, SRL–specific root length, TPH–Tillers per hill.

**Table S4. Physico–chemical characteristics (mean  $\pm$  S.E) of soil in crop field with uninvaded (UR) and invaded (IR) ridges.**

| Parameters | Rice                          |                               |                               |                               |                               |                               | Soybean                       |                               |                               |                               |                               |                               |
|------------|-------------------------------|-------------------------------|-------------------------------|-------------------------------|-------------------------------|-------------------------------|-------------------------------|-------------------------------|-------------------------------|-------------------------------|-------------------------------|-------------------------------|
|            | 0–1 m                         |                               | 2–3 m                         |                               | 4–5 m                         |                               | 0–1 m                         |                               | 2–3 m                         |                               | 4–5 m                         |                               |
|            | UR                            | IR                            |
| Gravel (%) | 53.87 $\pm$ 0.04 <sup>b</sup> | 50.40 $\pm$ 0.31 <sup>b</sup> | 62.04 $\pm$ 2.12 <sup>c</sup> | 43.05 $\pm$ 0.58 <sup>a</sup> | 47.26 $\pm$ 0.00 <sup>a</sup> | 44.09 $\pm$ 0.78 <sup>a</sup> | 65.76 $\pm$ 0.63 <sup>a</sup> | 66.28 $\pm$ 0.71 <sup>a</sup> | 74.46 $\pm$ 0.64 <sup>b</sup> | 73.33 $\pm$ 0.46 <sup>b</sup> | 74.07 $\pm$ 0.80 <sup>b</sup> | 71.66 $\pm$ 0.74 <sup>b</sup> |
| Sand (%)   | 14.25 $\pm$ 0.06 <sup>b</sup> | 15.90 $\pm$ 0.16 <sup>a</sup> | 13.84 $\pm$ 0.00 <sup>a</sup> | 16.99 $\pm$ 0.25 <sup>a</sup> | 15.17 $\pm$ 0.00 <sup>c</sup> | 16.05 $\pm$ 0.69 <sup>a</sup> | 10.65 $\pm$ 0.32 <sup>b</sup> | 10.51 $\pm$ 0.44 <sup>b</sup> | 8.49 $\pm$ 0.35 <sup>a</sup>  | 8.37 $\pm$ 0.43 <sup>a</sup>  | 9.56 $\pm$ 0.22 <sup>ab</sup> | 9.85 $\pm$ 0.49 <sup>ab</sup> |
| Silt (%)   | 7.49 $\pm$ 0.01 <sup>b</sup>  | 7.94 $\pm$ 0.42 <sup>a</sup>  | 6.99 $\pm$ 0.00 <sup>a</sup>  | 10.07 $\pm$ 0.54 <sup>a</sup> | 10.17 $\pm$ 0.00 <sup>c</sup> | 9.03 $\pm$ 0.62 <sup>a</sup>  | 5.77 $\pm$ 0.26 <sup>a</sup>  | 6.51 $\pm$ 0.67 <sup>a</sup>  | 4.22 $\pm$ 0.18 <sup>a</sup>  | 5.04 $\pm$ 0.64 <sup>a</sup>  | 4.85 $\pm$ 0.56 <sup>a</sup>  | 5.16 $\pm$ 0.50 <sup>a</sup>  |
| Clay (%)   | 25.39 $\pm$ 0.02 <sup>b</sup> | 25.76 $\pm$ 0.71 <sup>a</sup> | 22.91 $\pm$ 0.00 <sup>a</sup> | 29.89 $\pm$ 0.19 <sup>b</sup> | 27.40 $\pm$ 0.00 <sup>c</sup> | 30.83 $\pm$ 0.67 <sup>b</sup> | 17.82 $\pm$ 0.55 <sup>b</sup> | 16.70 $\pm$ 0.35 <sup>b</sup> | 12.83 $\pm$ 0.36 <sup>a</sup> | 13.26 $\pm$ 0.53 <sup>a</sup> | 11.53 $\pm$ 0.12 <sup>a</sup> | 13.33 $\pm$ 0.65 <sup>a</sup> |

|                          |                            |                             |                            |                            |                              |                            |                            |                            |                            |                            |                            |                            |
|--------------------------|----------------------------|-----------------------------|----------------------------|----------------------------|------------------------------|----------------------------|----------------------------|----------------------------|----------------------------|----------------------------|----------------------------|----------------------------|
| ST (° C)                 | 24.00±0.00 <sup>a</sup>    | 23.67±0.33 <sup>a</sup>     | 24.00±0.00 <sup>a</sup>    | 24.33±0.33 <sup>a</sup>    | 24.67±0.33 <sup>a</sup>      | 25.00±0.58 <sup>a</sup>    | 24.00±0.58 <sup>b</sup>    | 23.00±0.58 <sup>b</sup>    | 21.00±0.58 <sup>ab</sup>   | 21.67±0.33 <sup>b</sup>    | 18.33±0.88 <sup>a</sup>    | 18.33±0.33 <sup>a</sup>    |
| SMC (%)                  | 22.57±0.49 <sup>a</sup>    | 12.78±0.93 <sup>a</sup>     | 22.07±0.26 <sup>a</sup>    | 27.48±1.55 <sup>b</sup>    | 36.37±0.37 <sup>b</sup>      | 29.79±1.18 <sup>b</sup>    | 25.67±2.03 <sup>a</sup>    | 25.34±0.1.67 <sup>b</sup>  | 22.33±3.67 <sup>a</sup>    | 17.75±2.06 <sup>ab</sup>   | 22.00±6.25 <sup>a</sup>    | 9.51±2.69 <sup>a</sup>     |
| BD (g cm <sup>-3</sup> ) | 1.43±0.00 <sup>b</sup>     | 1.16±0.01 <sup>a</sup>      | 1.33±0.04 <sup>ab</sup>    | 1.19±0.01 <sup>a</sup>     | 1.26±0.00 <sup>a</sup>       | 1.19±0.01 <sup>a</sup>     | 1.18±0.01 <sup>a</sup>     | 1.22±0.03 <sup>a</sup>     | 1.39±0.03 <sup>b</sup>     | 1.34±0.03 <sup>ab</sup>    | 1.43±0.03 <sup>b</sup>     | 1.42±0.03 <sup>b</sup>     |
| Porosity (%)             | 45.18±0.00 <sup>a</sup>    | 55.57±0.27 <sup>a</sup>     | 48.84±1.71 <sup>ab</sup>   | 54.07±0.47 <sup>a</sup>    | 51.71±0.00 <sup>b</sup>      | 54.30±0.54 <sup>a</sup>    | 54.57±0.17 <sup>b</sup>    | 53.16±1.31 <sup>b</sup>    | 46.49±0.98 <sup>a</sup>    | 48.31±1.18 <sup>ab</sup>   | 45.04±1.05 <sup>a</sup>    | 45.43±1.19 <sup>a</sup>    |
| OC (%)                   | 1.82±0.02 <sup>a</sup>     | 2.20±0.02 <sup>a</sup>      | 2.04±0.02 <sup>b</sup>     | 2.21±0.01 <sup>a</sup>     | 1.81±0.00 <sup>a</sup>       | 2.41±0.02 <sup>a</sup>     | 2.23±0.00 <sup>a</sup>     | 2.27±0.02 <sup>b</sup>     | 2.32±0.01 <sup>b</sup>     | 2.16±0.02 <sup>a</sup>     | 2.57±0.02 <sup>c</sup>     | 2.63±0.02 <sup>c</sup>     |
| pH                       | 6.57±0.02 <sup>a</sup>     | 6.98±0.05 <sup>b</sup>      | 6.52±0.06 <sup>a</sup>     | 6.67±0.02 <sup>a</sup>     | 6.50±0.04 <sup>a</sup>       | 6.70±0.06 <sup>a</sup>     | 6.57±0.02 <sup>b</sup>     | 7.64±0.05 <sup>a</sup>     | 6.52±0.06 <sup>ab</sup>    | 7.41±0.20 <sup>a</sup>     | 6.37±0.03 <sup>a</sup>     | 7.53±0.11 <sup>a</sup>     |
| TN (%)                   | 0.29±0.01 <sup>b</sup>     | 0.29±0.02 <sup>a</sup>      | 0.28±0.00 <sup>b</sup>     | 0.29±0.01 <sup>a</sup>     | 0.25±0.01 <sup>a</sup>       | 0.30±0.01 <sup>a</sup>     | 0.30±0.01 <sup>b</sup>     | 0.33±0.02 <sup>ab</sup>    | 0.28±0.01 <sup>ab</sup>    | 0.28±0.02 <sup>a</sup>     | 0.27±0.01 <sup>a</sup>     | 0.39±0.01 <sup>b</sup>     |
| P (%)                    | 0.0027±0.0001 <sup>b</sup> | 0.0047±0.0001 <sup>ab</sup> | 0.0022±0.0001 <sup>a</sup> | 0.0043±0.0001 <sup>a</sup> | 0.0021±0.0001 <sup>a</sup>   | 0.0051±0.0001 <sup>b</sup> | 0.0030±0.0001 <sup>b</sup> | 0.0053±0.0001 <sup>a</sup> | 0.0023±0.0001 <sup>a</sup> | 0.0052±0.0001 <sup>a</sup> | 0.0022±0.0001 <sup>a</sup> | 0.0053±0.0001 <sup>a</sup> |
| K (%)                    | 0.0031±0.0001 <sup>a</sup> | 0.0039±0.0001 <sup>a</sup>  | 0.0036±0.0001 <sup>b</sup> | 0.0046±0.0001 <sup>b</sup> | 0.0034±0.00003 <sup>ab</sup> | 0.0048±0.0001 <sup>b</sup> | 0.0032±0.0001 <sup>a</sup> | 0.0035±0.0001 <sup>a</sup> | 0.0039±0.0001 <sup>b</sup> | 0.0043±0.0001 <sup>b</sup> | 0.0033±0.0001 <sup>a</sup> | 0.0050±0.0001 <sup>c</sup> |

Where, ST–soil temperature, SMC–soil moisture content, BD–bulk density, OC–organic carbon, TN–total nitrogen, P– available phosphorous, K– available potassium. Different lowercased alphabets above mean±S.E represent the significant difference at  $p < 0.05$  between distance intervals.

**Table S5: Uncertainty factor ( $^F U_{\text{meas}}$ ) for soil physico-chemical measurements.**

| Parameters               | Rice      |      |          |      |       |      |      |      | Soybean   |      |          |      |       |      |      |      |
|--------------------------|-----------|------|----------|------|-------|------|------|------|-----------|------|----------|------|-------|------|------|------|
|                          | Treatment |      | Distance |      |       |      |      |      | Treatment |      | Distance |      |       |      |      |      |
|                          |           |      | 0-1m     |      | 2-3 m |      | 4-5m |      |           |      | 0-1m     |      | 2-3 m |      | 4-5m |      |
|                          | UR        | IR   | UR       | IR   | UR    | IR   | UR   | IR   | UR        | IR   | UR       | IR   | UR    | IR   | UR   | IR   |
| Gravel (%)               | 1.13      | 1.08 | 1.00     | 1.01 | 1.06  | 1.02 | 1.00 | 1.03 | 1.06      | 1.05 | 1.02     | 1.02 | 1.02  | 1.01 | 1.02 | 1.02 |
| Sand (%)                 | 1.04      | 1.05 | 1.01     | 1.02 | 1.00  | 1.03 | 1.00 | 1.08 | 1.12      | 1.13 | 1.05     | 1.08 | 1.07  | 1.09 | 1.04 | 1.09 |
| Silt (%)                 | 1.19      | 1.15 | 1.00     | 1.09 | 1.00  | 1.10 | 1.00 | 1.13 | 1.20      | 1.23 | 1.09     | 1.19 | 1.08  | 1.24 | 1.23 | 1.19 |
| Clay (%)                 | 1.08      | 1.09 | 1.00     | 1.05 | 1.00  | 1.01 | 1.00 | 1.04 | 1.22      | 1.14 | 1.06     | 1.04 | 1.05  | 1.07 | 1.02 | 1.09 |
| ST (° C)                 | 1.02      | 1.04 | 1.00     | 1.02 | 1.00  | 1.02 | 1.02 | 1.04 | 1.14      | 1.11 | 1.04     | 1.04 | 1.05  | 1.03 | 1.09 | 1.03 |
| SMC (%)                  | 1.28      | 1.51 | 1.04     | 1.13 | 1.02  | 1.10 | 1.02 | 1.07 | 1.36      | 1.78 | 1.15     | 1.12 | 1.39  | 1.23 | 1.60 | 1.83 |
| BD (g cm <sup>-3</sup> ) | 1.06      | 1.02 | 1.00     | 1.01 | 1.06  | 1.02 | 1.00 | 1.02 | 1.10      | 1.08 | 1.01     | 1.05 | 1.03  | 1.04 | 1.03 | 1.04 |
| Porosity (%)             | 1.07      | 1.02 | 1.00     | 1.01 | 1.06  | 1.02 | 1.00 | 1.02 | 1.10      | 1.08 | 1.01     | 1.04 | 1.04  | 1.04 | 1.04 | 1.05 |
| OC (%)                   | 1.06      | 1.05 | 1.02     | 1.01 | 1.02  | 1.01 | 1.00 | 1.02 | 1.06      | 1.09 | 1.00     | 1.02 | 1.01  | 1.01 | 1.01 | 1.01 |
| pH                       | 1.01      | 1.02 | 1.00     | 1.01 | 1.02  | 1.01 | 1.01 | 1.01 | 1.02      | 1.03 | 1.00     | 1.01 | 1.02  | 1.05 | 1.01 | 1.03 |
| TN (%)                   | 1.08      | 1.07 | 1.04     | 1.11 | 1.02  | 1.04 | 1.05 | 1.07 | 1.06      | 1.18 | 1.03     | 1.10 | 1.04  | 1.11 | 1.04 | 1.05 |
| P (%)                    | 1.13      | 1.08 | 1.06     | 1.02 | 1.05  | 1.05 | 1.05 | 1.04 | 1.18      | 1.03 | 1.07     | 1.03 | 1.09  | 1.03 | 1.08 | 1.04 |
| K (%)                    | 1.08      | 1.10 | 1.03     | 1.04 | 1.04  | 1.03 | 1.02 | 1.03 | 1.11      | 1.17 | 1.07     | 1.04 | 1.04  | 1.05 | 1.04 | 1.04 |

Where, ST–soil temperature, SMC–soil moisture content, BD–bulk density, OC–organic carbon, TN–total nitrogen, P– available phosphorous, K– available potassium. Different lowercased alphabets above mean±S.E represent the significant difference at  $p < 0.05$  between distance intervals.

**Table S6: Multiple linear regression (MLR) analysis on morphological, yield and yield related parameters of crop.**

|     | Rice        |       |       |             |       |       |                | Soybean     |       |        |             |       |       |                |      |
|-----|-------------|-------|-------|-------------|-------|-------|----------------|-------------|-------|--------|-------------|-------|-------|----------------|------|
|     | Distance    |       |       | Treatment   |       |       |                | Distance    |       |        | Treatment   |       |       |                |      |
|     | Coefficient | T     | Sig.  | Coefficient | T     | Sig.  | R <sup>2</sup> | Coefficient | T     | Sig.   | Coefficient | T     | Sig.  | R <sup>2</sup> |      |
| SL  | 0.21        | 2.06  | 0.042 | -0.71       | -4.31 | 0.000 | 0.16           | SL          | 0.17  | 14.31  | 0.000       | -0.01 | -0.68 | 0.498          | 0.70 |
| RL  | 0.02        | 1.46  | 0.147 | 0.01        | 0.28  | 0.778 | 0.00           | RL          | 0.03  | 6.37   | 0.000       | 0.01  | 1.96  | 0.053          | 0.32 |
| SD  | 0.02        | 5.64  | 0.000 | -0.03       | -6.66 | 0.000 | 0.41           | SD          | 0.12  | 10.21  | 0.000       | 0.01  | 0.34  | 0.732          | 0.53 |
| PL  | 1.10        | 3.88  | 0.000 | -2.31       | -5.01 | 0.000 | 0.26           | PN          | 0.12  | 19.22  | 0.000       | 0.00  | -0.48 | 0.635          | 0.81 |
| GN  | 0.08        | 4.03  | 0.000 | -0.17       | -5.56 | 0.000 | 0.30           | GN          | 0.10  | 10.36  | 0.000       | -0.06 | -4.13 | 0.000          | 0.58 |
| SY  | 0.05        | 4.68  | 0.000 | -0.12       | -6.69 | 0.000 | 0.38           | SY          | 0.19  | 15.44  | 0.000       | 0.00  | 0.04  | 0.966          | 0.73 |
| RY  | 0.06        | 5.10  | 0.000 | -0.08       | -4.45 | 0.000 | 0.29           | RY          | 0.13  | 14.63  | 0.000       | 0.00  | 0.16  | 0.876          | 0.70 |
| GY  | 0.06        | 5.10  | 0.000 | -0.08       | -4.45 | 0.000 | 0.29           | GY          | 0.11  | 11.80  | 0.000       | -0.06 | -3.49 | 0.001          | 0.63 |
| SPP | 0.18        | 4.35  | 0.000 | -0.31       | -4.63 | 0.000 | 0.26           | PY          | 0.05  | 3.02   | 0.003       | -0.08 | -3.06 | 0.003          | 0.16 |
| SRL | 0.33        | 6.12  | 0.000 | -0.06       | -1.69 | 0.094 | 0.26           | SRL         | -0.20 | -14.01 | 0.000       | 0.02  | 0.83  | 0.410          | 0.69 |
| HI  | 0.00        | 0.82  | 0.413 | 0.01        | 2.34  | 0.021 | 0.04           | HI          | -0.01 | -1.80  | 0.076       | 0.01  | 1.50  | 0.136          | 0.04 |
| R:S | -0.01       | -2.42 | 0.017 | 0.00        | -0.72 | 0.476 | 0.04           | R:S         | 0.00  | 3.96   | 0.000       | 0.01  | 3.33  | 0.001          | 0.22 |
| TD  | 22.30       | 2.33  | 0.022 | 13.06       | 2.23  | 0.028 | 0.07           | Density     | 13.27 | 12.46  | 0.000       | 1.33  | 0.77  | 0.445          | 0.63 |
| HD  | 1.41        | 0.41  | 0.682 | 4.67        | 2.22  | 0.028 | 0.03           |             |       |        |             |       |       |                |      |
| TPH | 0.19        | 2.41  | 0.018 | -0.04       | -0.88 | 0.379 | 0.04           |             |       |        |             |       |       |                |      |

TD–tiller density, HD–hill density, D– stem density, SL–shoot length, RL–root length, PL–panicle length, SPP–spikelets per panicle, PN– Pod number, PY–pod yield, SY–straw yield, RY–root yield, GY– grain yield, SD–stem diameter, HI–harvest index, R:S–root to shoot ratio, SRL–specific root length, TPH–Tillers per hill.

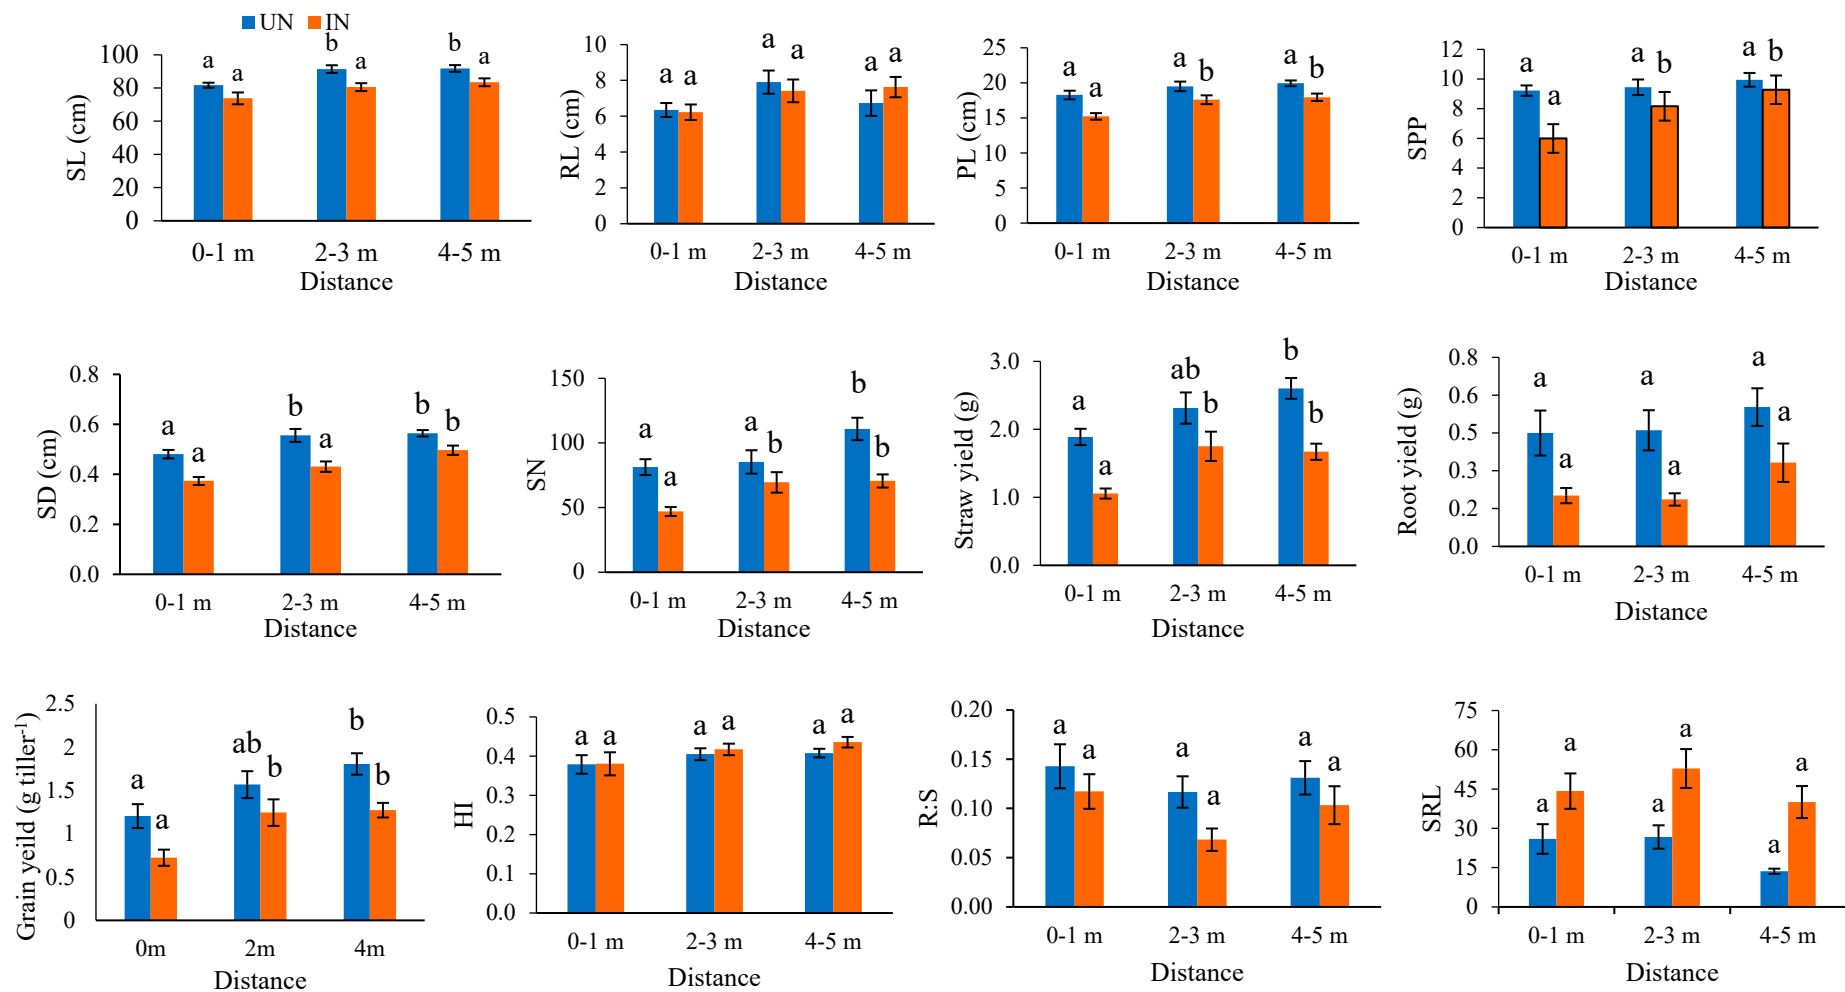

**Figure S1.** Morphological and yield parameters of rice crop at different distance intervals (0-1, 2-3, 4-5 m) from ridge. Different small letters above bar represent the significant difference at  $p < 0.05$  between distance intervals. UR-fields with uninvaded ridges, IR-fields with invaded ridges, SL-shoot length, RL-root length, PL-panicle length, GN-grain number, SPP-spikelets per panicle, SY-straw yield, RY-root yield, GY-grain yield, SD-stem diameter, HI-harvest index, R:S-root to shoot ratio, SRL-specific root length, HI-harvest index, R:S-root to shoot ratio, SRL-specific root length.

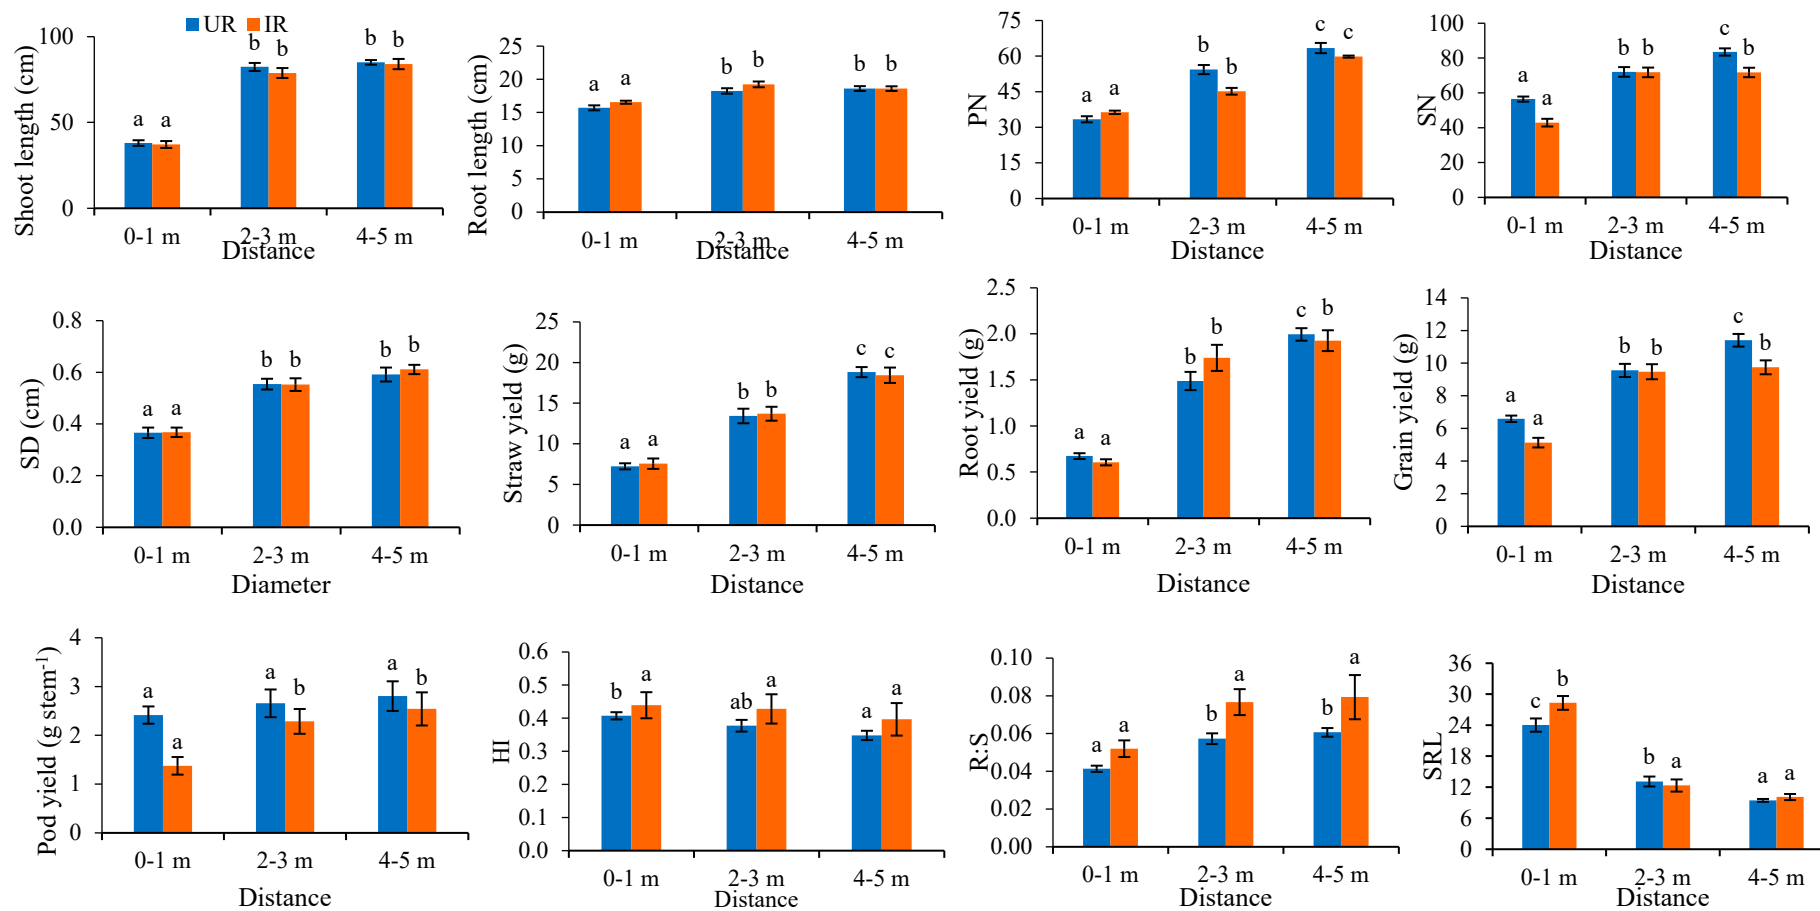

**Figure S2.** Treatment wise morphological and yield parameters of soybean crop in different distance intervals (0-1, 2-3, 4-5 m) in study site. Different small letters above bar represent the significant difference at  $p < 0.05$  between distance intervals. UR-fields with uninvaded ridges, IR-fields with invaded ridges, SL-shoot length, RL-root length, PL-panicle length, SPP-spikelets per panicle, PN- Pod number, PY-pod yield, SY-straw yield, RY-root yield, GY- grain yield, SD-stem diameter, HI-harvest index, R:S-root to shoot ratio, SRL-specific root length.

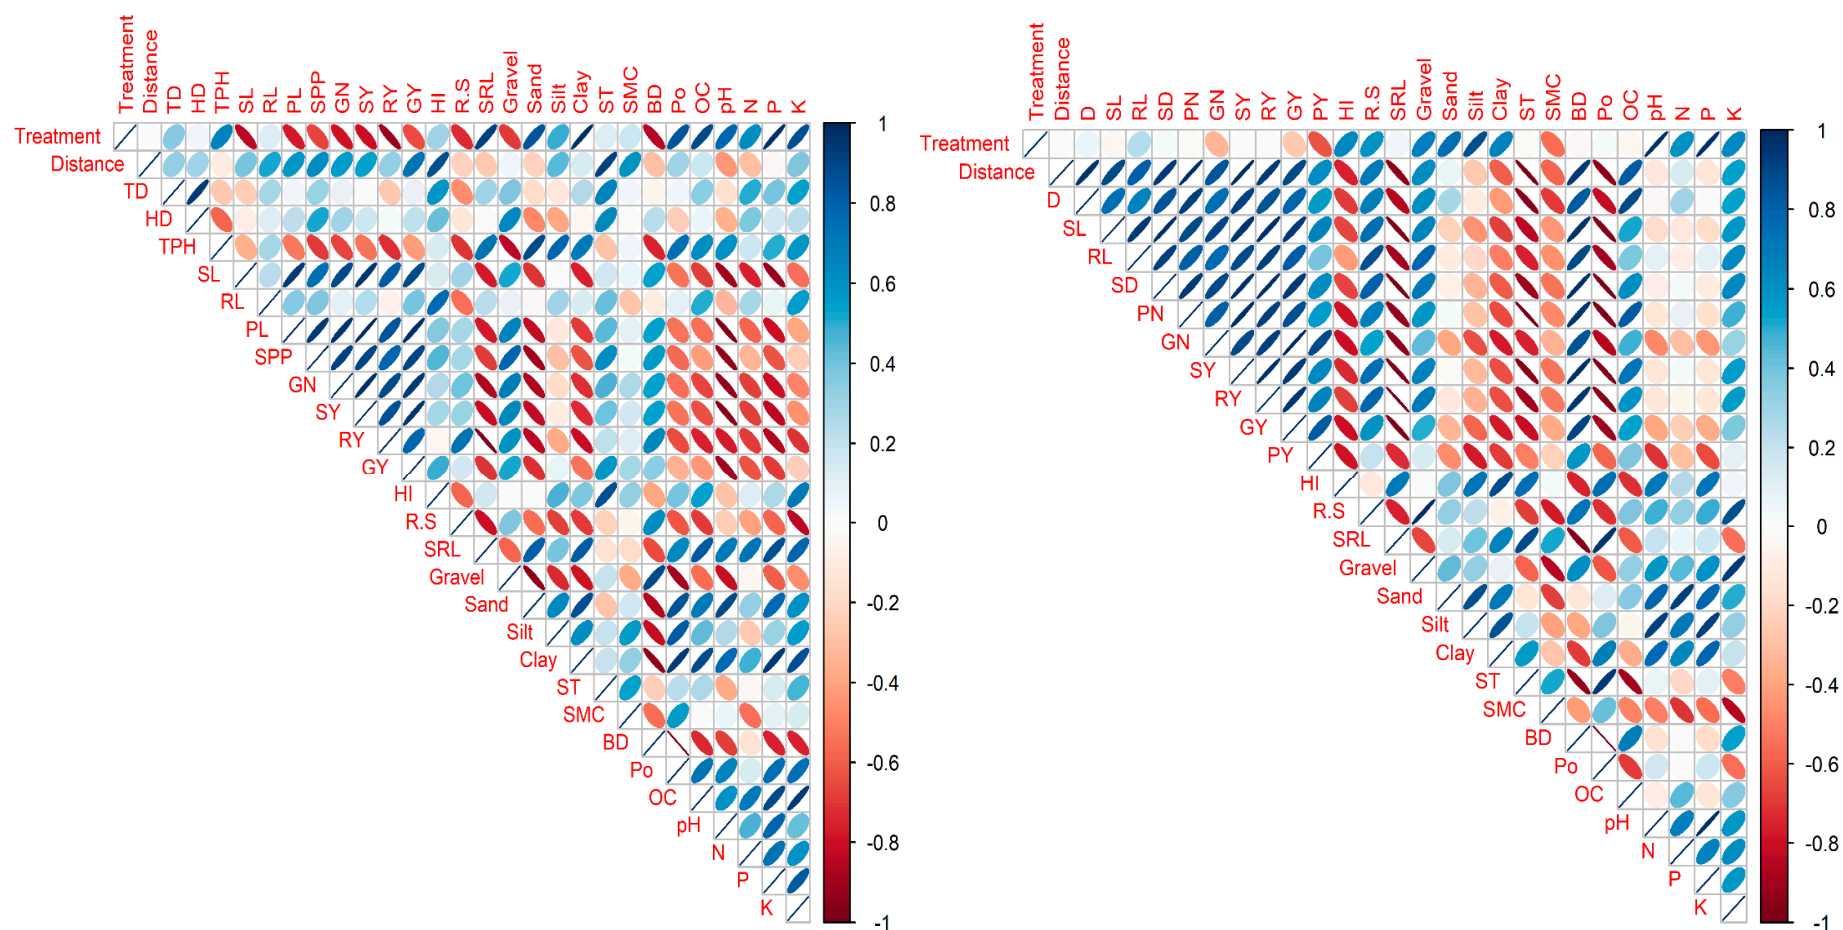

**Figure S3.** Pearson correlations between physical and chemical characteristics of soil, morphological and yield parameters of a. rice and, b. soybean crop, where, TD–tiller density, HD–hill density, TPH–tillers per hill, D– stem density, SL–shoot length, RL–root length, PL–panicle length, SPP–spikelet per panicle, GN–grain number, SY–straw yield, RY–root yield, GY– grain yield, SD–stem diameter, HI–harvest index, R:S–root to shoot ratio, SRL–specific root length. Boxed eclipses are significantly different at  $p < 0.05$ .
